# Supplementary material for: Anti-Inflammatory and Analgesic Evaluation of a Phytochemical Intercalated into Layered Double Hydroxide
Source: MDPI journal article supplement (doi:10.3390/pharmaceutics14050934), 2022-04-25
Supplement: s1 [file s1]

## **Supplementary Material**

### **Anti-inflammatory and Analgesic evaluation of a phytochemical intercalated into Layered Double Hydroxide**

**Viviane A. Guilherme<sup>1,2</sup>, Vanessa R. R. Cunha<sup>3,4</sup>, Eneida de Paula<sup>1</sup>, Daniele R. de Araujo<sup>5\*</sup>, Vera R. L. Constantino<sup>3\*</sup>**

<sup>1</sup> Departamento de Bioquímica e Biologia Tecidual, Instituto de Biologia, Universidade Estadual de Campinas, UNICAMP, 13083-862, Campinas, São Paulo, Brazil. [viguilherme@gmail.com](mailto:viguilherme@gmail.com) (V.A.G.), [depaula@unicamp.br](mailto:depaula@unicamp.br) (E.P.)

<sup>2</sup> Faculdade de Farmácia, Universidade Adventista de São Paulo, UNASP, 13448-900, Engenheiro Coelho, São Paulo, Brazil.

<sup>3</sup> Departamento de Química Fundamental, Instituto de Química, Universidade de São Paulo, USP, Av. Prof. Lineu Prestes 748, 05508-000, São Paulo, São Paulo, Brazil.

<sup>4</sup> Instituto Federal de Educação, Ciência e Tecnologia de Mato Grosso - Campus Juína, IFT-MT, Juína-MT, Brasil. [vanesssa.roberta@ifmt.edu.br](mailto:vanesssa.roberta@ifmt.edu.br) (V.R.R.C)

<sup>5</sup> Centro de Ciências Naturais e Humanas, Universidade Federal do ABC, UFABC, 09210-170, Santo André, São Paulo, Brazil.

\* Correspondence: [daniele.araujo@ufabc.edu.br](mailto:daniele.araujo@ufabc.edu.br) (D.R.A.); [vrlconst@iq.usp.br](mailto:vrlconst@iq.usp.br) (V.R.L.C.)

## 1. Materials and Methods

### 1.1. Reagents

*p*-coumaric acid ( $C_9H_8O_3$ , Sigma), aluminum chloride hexahydrate ( $AlCl_3 \cdot 6H_2O$ , Aldrich), zinc chloride ( $ZnCl_2$ , Aldrich), sodium hydroxide (NaOH, Merck), caffeine (Sigma-Aldrich), naloxone (Sigma-Aldrich), penicillin (Nutricell), neutral red (Sigma-Aldrich), phosphate buffer saline (PBS), Turk's solution, and Dulbecco's Modified Eagle Medium (DMEM, Nutricell) were used without further purification.

### 1.2. Spectrophotometric determination of *p*-coumaric acid concentration

The wavelength of maximum coumaric acid absorption in sodium chloride aqueous solution (NaCl 0.9 %), the UV-VIS spectra of CouH solution concentration from 10 to 50  $\mu\text{mol L}^{-1}$  were recorded in the 200 to 500 nm range, using a cuvette of 1 cm of optical pathway (Figure S1). The spectra were recorded in a spectrophotometer UV-VIS (Varian Cary 50 / Bio-Tek ELx 800) and values were analyzed by Graph Pad Software, Inc., USA and the Beer's Law was applied.

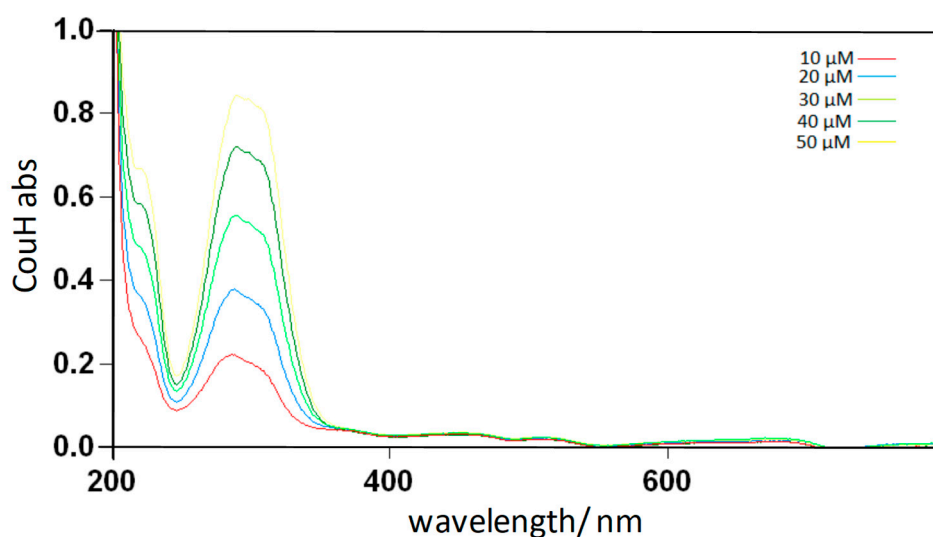

**Figure S1.** UV-VIS spectra of coumaric acid in different concentrations in sodium chloride aqueous solution (0.9 % NaCl).

The calibration curve obtained at 288 nm, Figure S2, provided the molar absorptivity of coumaric acid,  $1907 \text{ L mol}^{-1} \text{ cm}^{-1}$  with correlation coefficient ( $R^2$ ) of 0.99969 ( $y = -0.00404 + 0.01907x$ ) and it was used to determine the concentration of coumarate delivery in time, as well, to calculate the delivery constant.

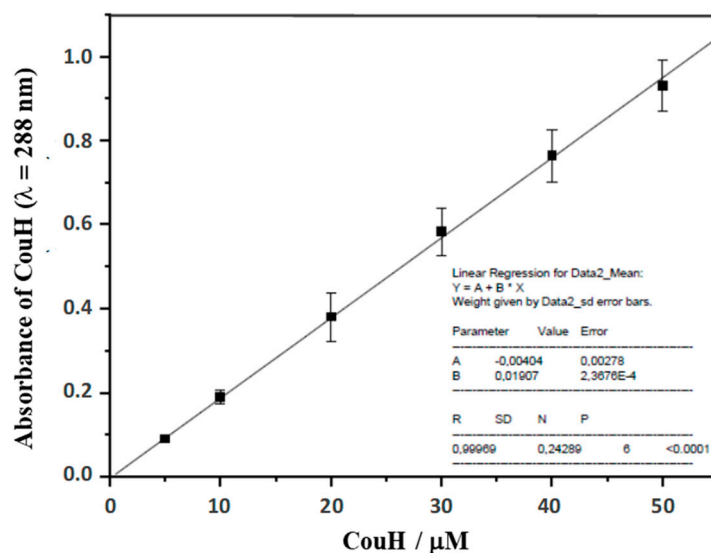

**Figure S2.** Calibration curve of coumaric acid obtained by UV-VIS spectrophotometry at different concentrations ( $n=6$ ).

Zeta potential and particle size were measured with Zetasizer NanoZS, Malvern Instruments, Worcestershire, UK. The mean hydrodynamic diameter of the suspension of LDH-Cou obtained by Dynamic Light Scattering (DLS) is 226 nm (Pdl: 0.419). It can be noticed the slight particle size variation (Figure S3), obtaining a mono-modal system with a similar particle size population. Moreover, LDH-Cou shows low tendency towards agglomeration since its zeta potential is + 39 mV, which indicates a good stability of the aqueous dispersion of the material.

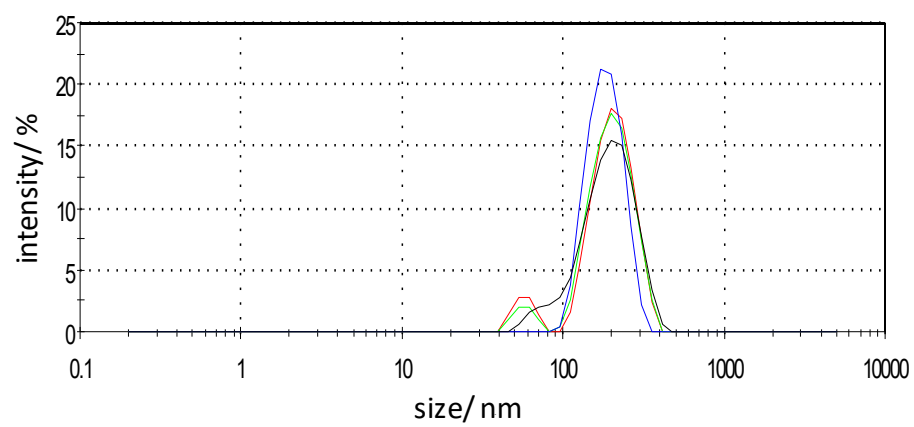

**Figure S3.** Particle size distribution of LDH-Cou sample.
